# Supplementary material for: High Nitric Oxide Concentration Inhibits Photosynthetic Pigment Biosynthesis by Promoting the Degradation of Transcription Factor HY5 in Tomato
Source: MDPI journal article supplement (doi:10.3390/ijms23116027), 2022-05-27
Supplement: s1 [file s1]

## Supporting Information

**Article title:** High Nitric Oxide Concentration Inhibits Photosynthetic Pigment Biosynthesis by Promoting the Degradation of Transcription Factor HY5 in Tomato

**Authors:** Lingyu Wang<sup>1</sup>, Rui Lin<sup>1</sup>, Jin Xu<sup>1</sup>, Jianing Song<sup>1</sup>, Shujun Shao<sup>1</sup>, Jingquan Yu<sup>1,2</sup> and Yanhong Zhou<sup>1,2,\*</sup>

The following Supporting Information is available for this article:

**Figure S1.** The *gsnor* mutant transgenic tomato plants.

**Figure S2.** Relative expression of *PORs* and *PSYs*.

**Figure S3.** Both endogenous and exogenous NO inhibit the photosynthetic capacity.

**Figure S4.** NO signalling regulates pigments production in a dose-dependent manner.

**Figure S5.** The *hy5* mutant transgenic tomato plants.

**Figure S6.** HY5 binding motif in the promoters of *PORC* and *PSY2* in tomato.

**Figure S7.** HY5 directly binds to the *PORC* and *PSY2* promoters and activates their transcription.

**Figure S8.** Efficiency of *GSNOR* silencing by virus-induced gene silencing (VIGS) in WT and *hy5*.

**Figure S9.** NO donors inhibit the expression of photosynthetic pigments biosynthesis-related genes through HY5.

**Table S1.** Primers used for RT-qPCR.

**Table S2.** Primers used for DNA constructs.

**Table S3.** Primers used for EMSA.

**Table S4.** Primers used for ChIP-qPCR.

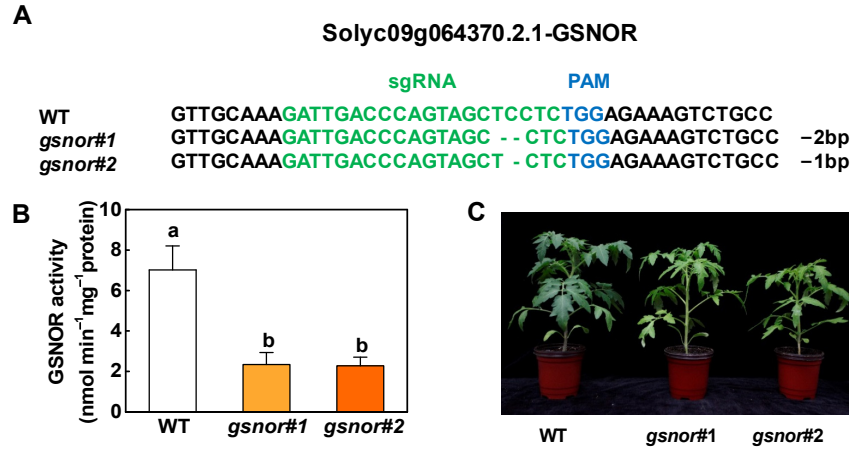

**Figure S1.** The *gsnor* mutant transgenic tomato plants. (A) Schematic illustration of the sgRNA in wild type (WT) and two alleles of *gsnor* from CRISPR/Cas9 T2 mutant lines. Green font presents the sgRNA target sequence, and blue font presents protospacer-adjacent motif (PAM) sequence. The *gsnor#1* mutant carries a 2-bp deletion in the GSNOR ORF, and the *gsnor#2* mutant carries an 1-bp deletion in the GSNOR ORF, which leads to a frame shift and the generation of a premature stop codon, TGA. (B) GSNOR activity in WT, *gsnor#1*, and *gsnor#2*. Data are shown as means  $\pm$  SD ( $n=4$ ). Different letters indicate significant difference at  $p < 0.05$  according to Tukey's test. (C) Phenotypes displayed by WT, *gsnor#1*, and *gsnor#2* mutants.

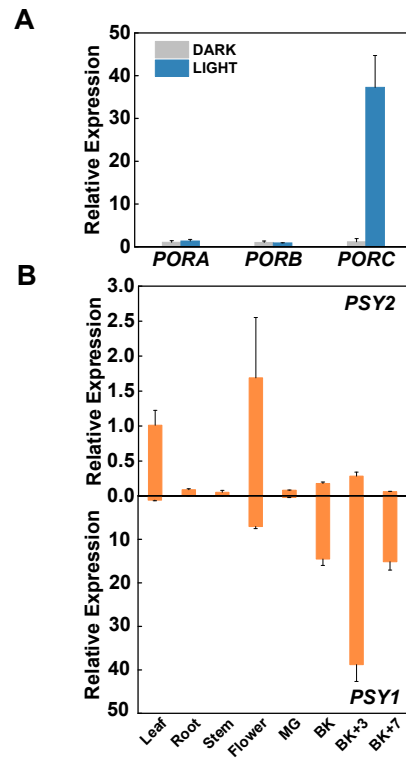

**Figure S2.** Relative expression of *PORs* and *PSYs*. **(A)** Relative transcripts of *PORA*, *PORB*, and *PORC* in leaves of WT under dark or 6h light conditions. **(B)** Relative transcripts of *PSY1* and *PSY2* in different tissues and the mature green (MG), breaker (BK), three days after breaker (BK+3), and seven days after breaker (BK+7) ripening stages. Data are shown as means  $\pm$  SD ( $n = 3$ ).

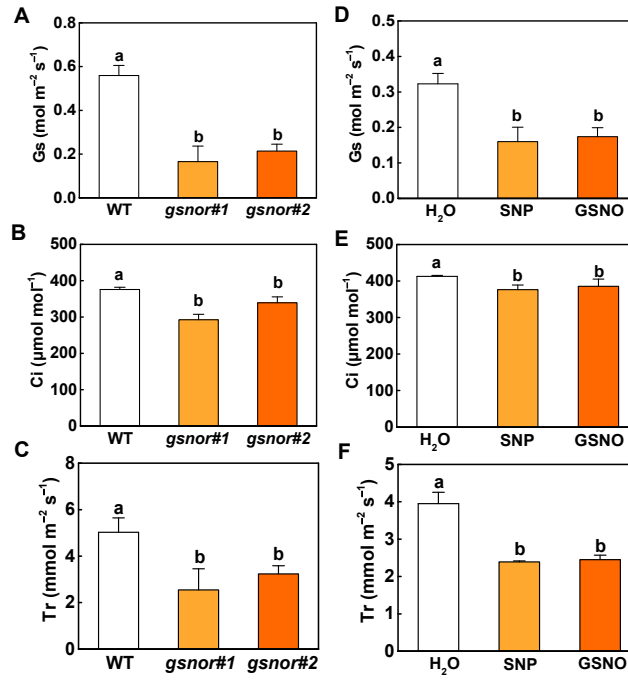

**Figure S3.** Both endogenous and exogenous NO inhibit the photosynthetic capacity. (A–C) Internal CO<sub>2</sub> concentration (Ci), transpiration rate (Tr), and stomatal conductance (Gs) in WT, *gsnor#1*, and *gsnor#2*. (D–F) Ci, Tr, and Gs in tomato plants treated with H<sub>2</sub>O, 500  $\mu$ M SNP, and 500  $\mu$ M GSNO. Data are shown as means  $\pm$  SD ( $n = 3$ ). Different letters indicate significant difference at  $p < 0.05$  according to Tukey's test.

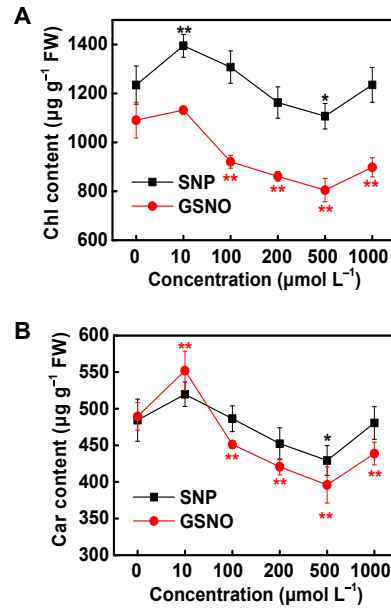

**Figure S4.** NO signalling regulates pigments production in a dose-dependent manner. **(A,B)** Chlorophyll and carotenoid content of leaves were treated with various concentration gradient (10, 100, 200, 500, and 1000  $\mu\text{M}$ ) of sodium nitroprusside (SNP) and S-nitroso glutathione (GSNO) as foliar spray. Water was represented by 0  $\mu\text{M}$  of spraying treatment. Data are shown as means  $\pm$  SD ( $n = 4$ ). Statistically significant differences were indicated using asterisks (\*\*,  $p < 0.01$ ; \*,  $p < 0.05$ ), according to Tukey's test.

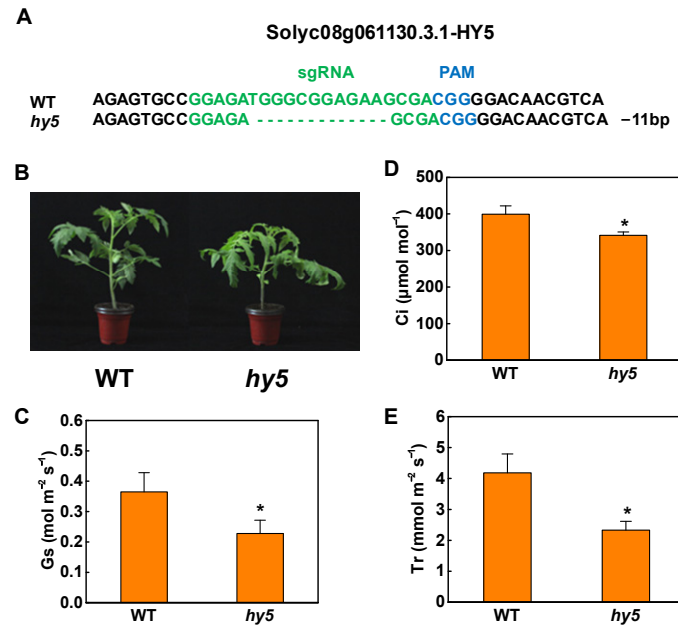

**Figure S5.** The *hy5* mutant transgenic tomato plants. **(A)** Schematic illustration of the sgRNA in wild type (WT) and the CRISPR/Cas9 T2 *hy5* mutant. Green font presents the sgRNA target sequence, and blue font presents protospacer-adjacent motif (PAM) sequence. The *hy5* mutant carries a 11-bp deletion in the HY5 ORF, which leads to a frame shift and the generation of a premature stop codon, TAG. **(B)** Phenotypes displayed by the WT and *hy5* mutant plants. **(C–E)** Ci, Tr, and Gs in WT and *hy5*. Data are shown as means  $\pm$  SD ( $n = 4$ ). Statistically significant differences were indicated using asterisks (\*,  $p < 0.05$ ), according to Tukey's test.

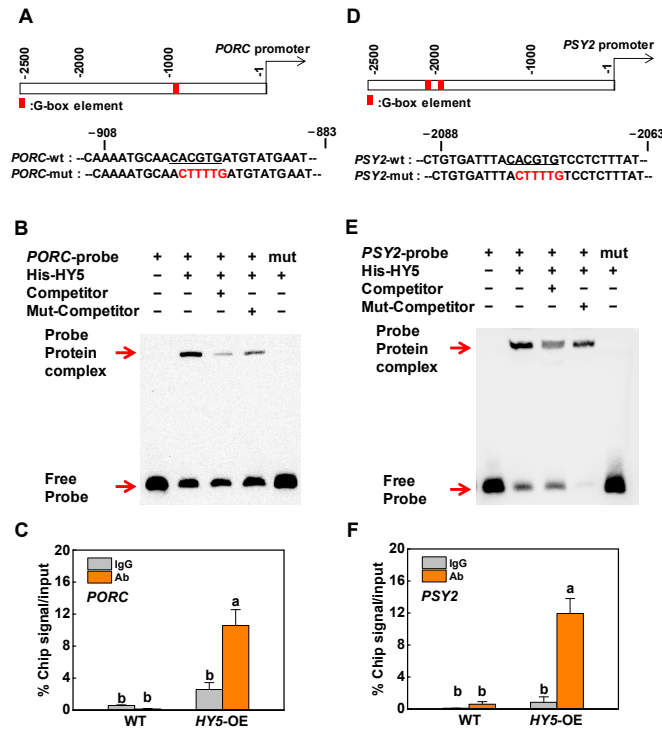

**Figure S6.** HY5 directly binds to the *PORC* and *PSY2* promoters and activates their transcription. (A,D) HY5 binding motif in the promoters of *PORC* and *PSY2* in tomato. The wild-type (*PORC*-wt, *PSY2*-wt) and mutant (*PORC*-mut, *PSY2*-mut) oligos were used in EMSA assays. (B,E) EMSA assay. The His-HY5 recombinant protein was incubated with biotin-labeled wild-type or mutant *PORC* and *PSY2* oligos. The protein purified from the empty vector was used as a negative control. (C,F) ChIP-qPCR assay. Leaf samples from WT and *HY5*-OE tomato plants were precipitated with an anti-HA antibody. A control reaction was processed simultaneously using mouse IgG. The ChIP results are presented as percentages of the input DNA. Data are shown as means  $\pm$  SD ( $n = 3$ ). Different letters indicate significant difference at  $p < 0.05$  according to Tukey's test.

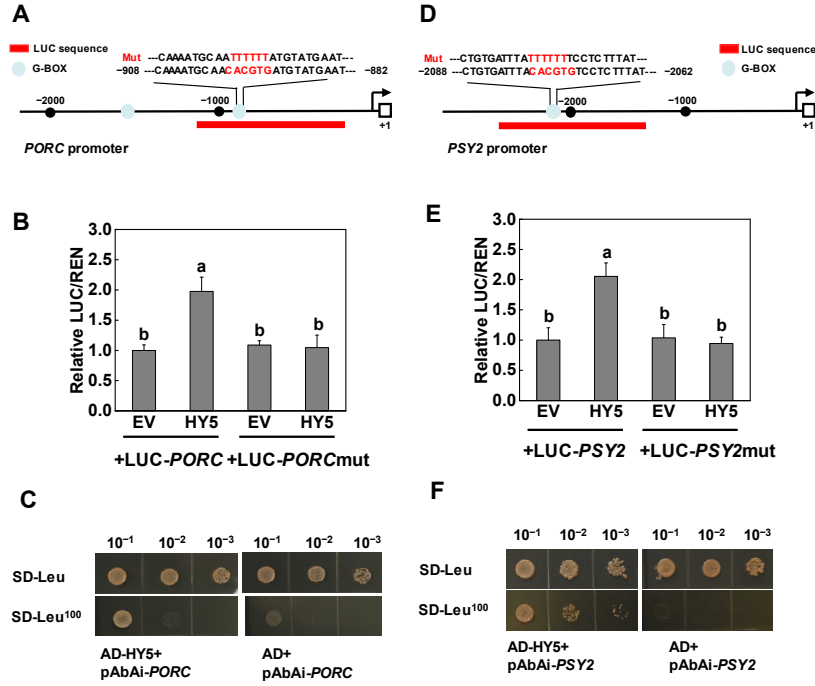

**Figure S7.** HY5 directly binds to the *PORC* and *PSY2* promoters and activates their transcription. (A,D) Promoter fragments of *PORC* (−1186 to −1) and *PSY2* (−2267 to −1699) used for the dual luciferase assay. (B,E) Relative LUC/REN ratio. Tobacco (*Nicotiana benthamiana*) leaves were infiltrated, and the firefly LUC and REN LUC were assayed 3 days after infiltration. The ratio of LUC/REN of the empty vector (EV) plus *PORC* or *PSY2* promoter was set as 1. Data are shown as means ± SD ( $n = 6$ ). Different letters indicate significant difference at  $p < 0.05$  according to Tukey's test. (C,F) Yeast-one hybrid assay. The reporter vector was introduced into yeast strain Y1HGold with the effector vector. The transformants were grown on a selective medium (SD/-Leu) without or with 100 ng ml<sup>−1</sup> AbA. A combination of reporter vector and the empty vector pGADT7 was used as a negative control.



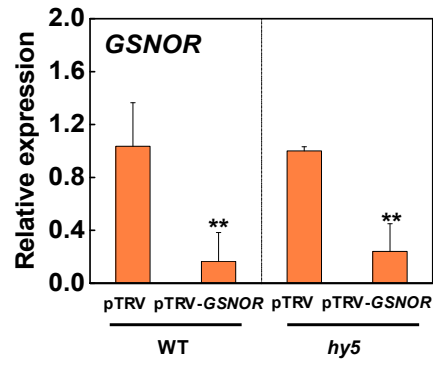

**Figure S8.** Efficiency of *GSNOR* silencing by virus-induced gene silencing (VIGS) in WT and *hy5*. Statistically significant differences were indicated using asterisks (\*\*,  $p < 0.01$ ), according to Tukey's test.

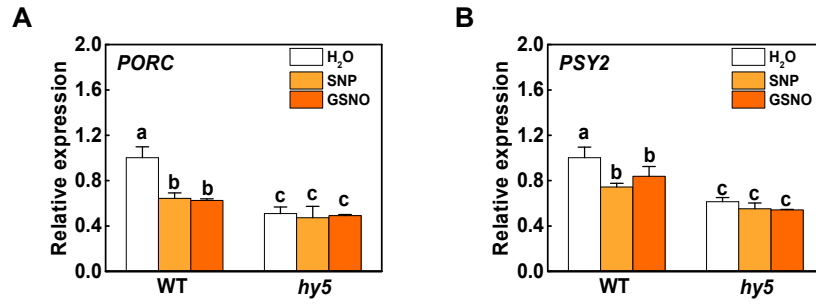

**Figure S9.** NO donors inhibit the expression of photosynthetic pigments biosynthesis-related genes through HY5. **(A)** Relative transcripts of *PORC* and **(B)** *PSY2* in WT and *hy5* plants treated with H<sub>2</sub>O, 500  $\mu$ M SNP, and 500  $\mu$ M GSNO. Data are shown as means  $\pm$  SD ( $n = 3$ ). Different letters indicate significant difference at  $p < 0.05$  according to Tukey's test.

**Table S1.** Primers used for RT-qPCR.

| ID                    | Primer sequence(5'-3') |
|-----------------------|------------------------|
| qPCR- <i>ACTIN</i> -F | GTCCTCTTCCAGCCATCCAT   |
| qPCR- <i>ACTIN</i> -R | ACCACTGAGCACAATGTTACCG |
| qPCR- <i>PSY1</i> -F  | CTGGAAGGGTGACCGATAAA   |
| qPCR- <i>PSY1</i> -R  | ACCAAAGATGCCCATACAGG   |
| qPCR- <i>PSY2</i> -F  | CCGAATTCCGAGGTCTCATA   |
| qPCR- <i>PSY2</i> -R  | AAAATTCCACCCCTGTCTCC   |
| qPCR- <i>PORA</i> -F  | ACTCCTGCAATCACCCAGTC   |
| qPCR- <i>PORA</i> -R  | TCGCCTATAGCCTTTGCTGT   |
| qPCR- <i>PORB</i> -F  | CATCTCCCGGTGTAACGAGT   |
| qPCR- <i>PORB</i> -R  | ACATGCCATTTCCCTGTCTC   |
| qPCR- <i>PORC</i> -F  | CTCCAAGGGCAAAGCTAGTG   |
| qPCR- <i>PORC</i> -R  | GCTCTTACAACACCGCCATT   |
| qPCR- <i>HY5</i> -F   | GCAAGCGACGAGTTCTAT     |
| qPCR- <i>HY5</i> -R   | ATCTCCGGCACTCTTCTG     |

**Table S2.** Primers used for DNA constructs.

| ID                   | Primer sequence(5'-3')                                     |
|----------------------|------------------------------------------------------------|
| pET32a-HY5-BamHI-F   | gccatggctgatatcggatccATGCAAGAGCAAGCGACG                    |
| pET32a-HY5-HindIII-R | gtggtgggtgggtgctcgagCTTCCTCCCTTCCTGTGC                     |
| SK-HY5-BamHI-F       | cgctctagaactagtggatccGAATGCAAGAGCAAGCGACG                  |
| SK-HY5-KpnI-R        | tgatttcagcgaattggtaccCTTCCTCCCTTCCTGTGCA                   |
| LUC-PORC-XhoI-F      | ggtagcgggccccccctcgagACCTCGAAGTCTAGCAGCCTAAAT              |
| LUC-PORC-BamHI-R     | cgctctagaactagtggatccTAAGAAGTTCAATTTTGGGAATTTT             |
| LUC-PSY2-XhoI-F      | ggtagcgggccccccctcgagAGTTTTTACGTGGTCCGCTCTT                |
| LUC-PSY2-BamHI-R     | cgctctagaactagtggatccAGCTAACTAGCTTCCGAGGGAAT               |
| pTRV-GSNOR-XbaI-F    | tgctctagaAGCAACCCATTCAGCAAGTC                              |
| pTRV-GSNOR-BamHI-R   | cgcggatccTGTTTATGTCCGCAAGTGTC                              |
| AD-HY5-NedI-F        | ggaattccatagATGCAAGAGCAAGCGACGA                            |
| AD-HY5-BamHI-R       | cgggatccCTTCCTCCCTTCCTGTGC                                 |
| pAbAi-PORC--F        | cttgaattcgagctcggtaccGGTTGATGATCTTGAGTTATTTTTCG            |
| pAbAi-PORC--R        | atacagagcacatgcctcgagCGAGAACCAGTAATTTATGACTTGTT<br>T       |
| pAbAi-PSY2-KpnI-F    | cttgaattcgagctcggtaccAGGTTTCGTACGTTCTGGTGTATGA             |
| pAbAi-PSY2-XhoI-R    | atacagagcacatgcctcgagAGATAGTCAATAATTTCTTGATTATCA<br>ATAAAA |

**Table S3.** Primers used for EMSA.

| <b>ID</b>          | <b>Primer sequence(5'-3')</b> |
|--------------------|-------------------------------|
| <i>PORC</i> -wt-F  | CAAAATGCAACACGTGATGTATGAAT    |
| <i>PORC</i> -wt-R  | ATTCATACATCACGTGTTGCATTTTG    |
| <i>PORC</i> -mut-F | CAAAATGCAACTTTTGATGTATGAAT    |
| <i>PORC</i> -mut-R | ATTCATACATCAAAAGTTGCATTTTG    |
| <i>PSY2</i> -wt-F  | CTGTGATTTACACGTGTCCTCTTTAT    |
| <i>PSY2</i> -wt-R  | ATAAAGAGGACACGTGTAAATCACAG    |
| <i>PSY2</i> -mut-F | CTGTGATTTATCCTCTTTAT          |
| <i>PSY2</i> -mut-R | ATAAAGAGGATAAATCACAG          |

**Table S4.** Primers used for ChIP-qPCR.

| <b>ID</b>                 | <b>Primer sequence(5'-3')</b> |
|---------------------------|-------------------------------|
| ChIP-qPCR- <i>PORC</i> -F | AAAACACACTCAATTATGATAGACCA    |
| ChIP-qPCR- <i>PORC</i> -R | CGAGAAATTTTCGAGAACCAG         |
| ChIP-qPCR- <i>PSY2</i> -F | GTAACCCAGCTGCCCCACTT          |
| ChIP-qPCR- <i>PSY2</i> -R | AAAGAATATGAGCATTATTGAGTCCA    |
